# Supplementary material for: Lewis-acid catalyzed synthesis and characterization of novel castor fatty acid-based cyclic carbonates
Source: Royal Society of Chemistry journal article supplement (doi:10.1039/c6ra00880a), 2016-01-01
Supplement: c6ra00880a1.pdf [file c6ra00880a1.pdf]

## SUPPLEMENTARY INFORMATION

### Lewis-Acid Catalyzed Synthesis and Characterization of Novel Castor Fatty Acid-Based Cyclic Carbonates

Naganna Narra<sup>a,c</sup>, Badari Narayana Prasad Rachapudi<sup>a,c</sup>, Sahithya Phani babu Vemulapalli<sup>b,c</sup> and Padmaja V. Korlipara<sup>a,c</sup> \*

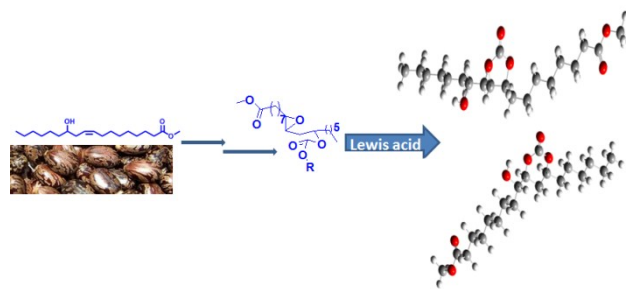

\*

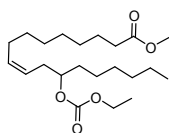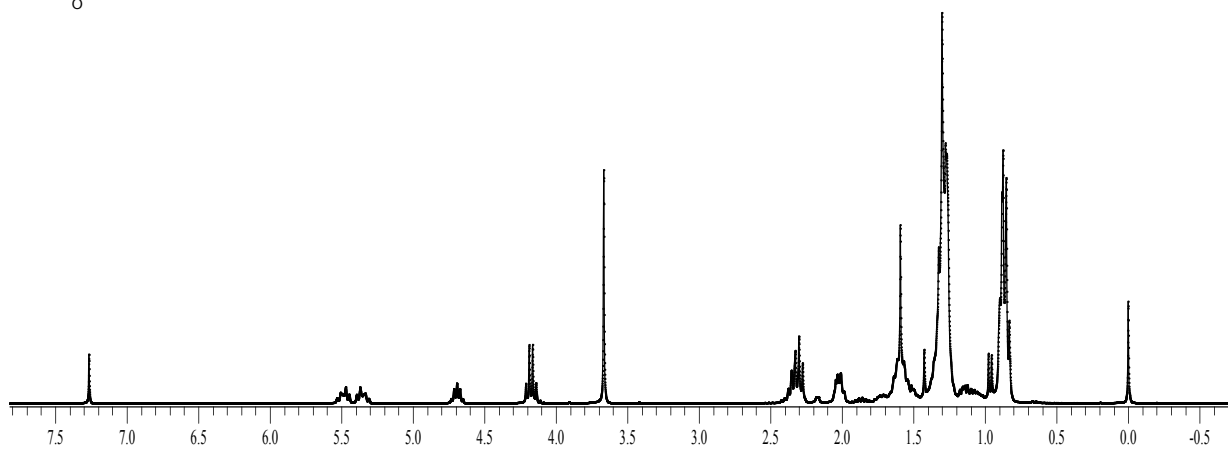

**Figure S1.** <sup>1</sup>H NMR spectrum of **2b**.

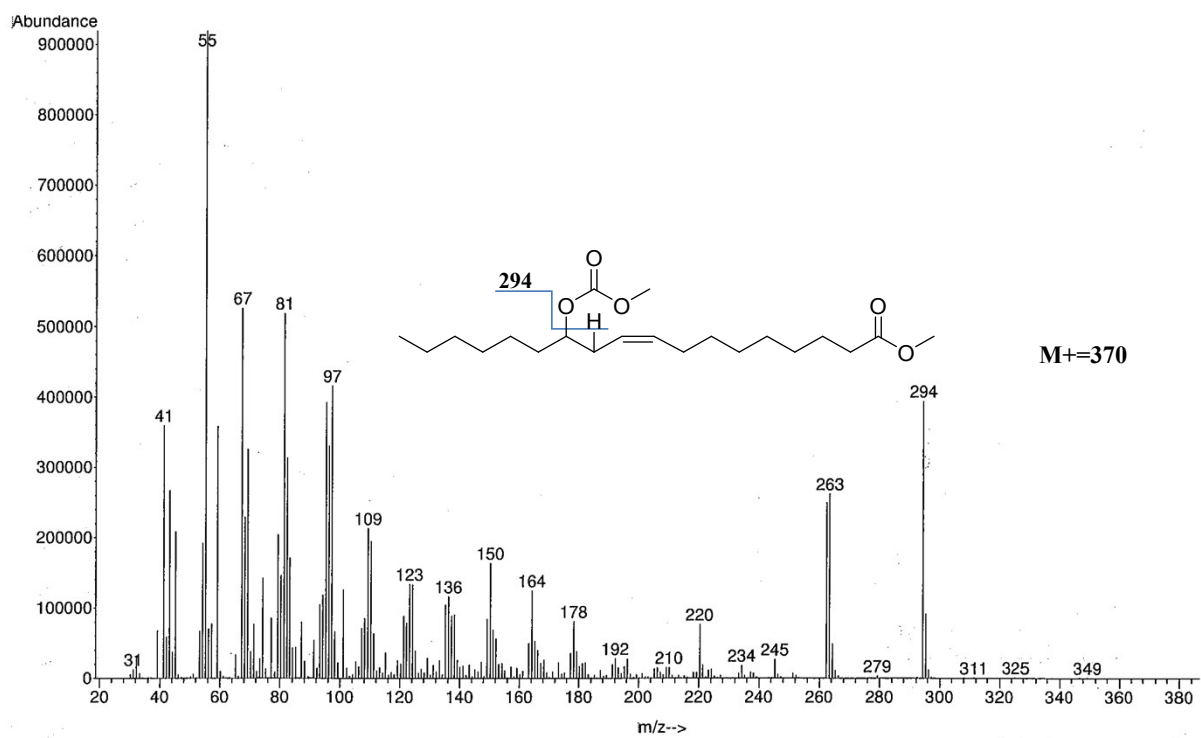

**Figure S2.** The mass spectrum of **2a**

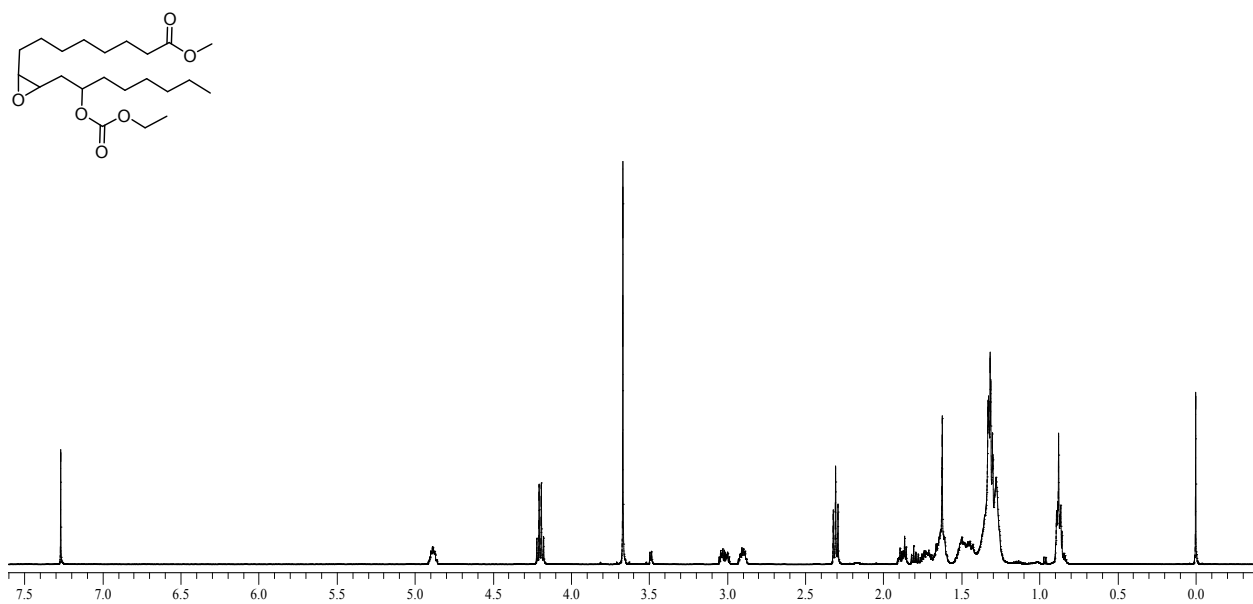

**Figure S3.**  $^1\text{H}$  NMR spectrum of **3b**.

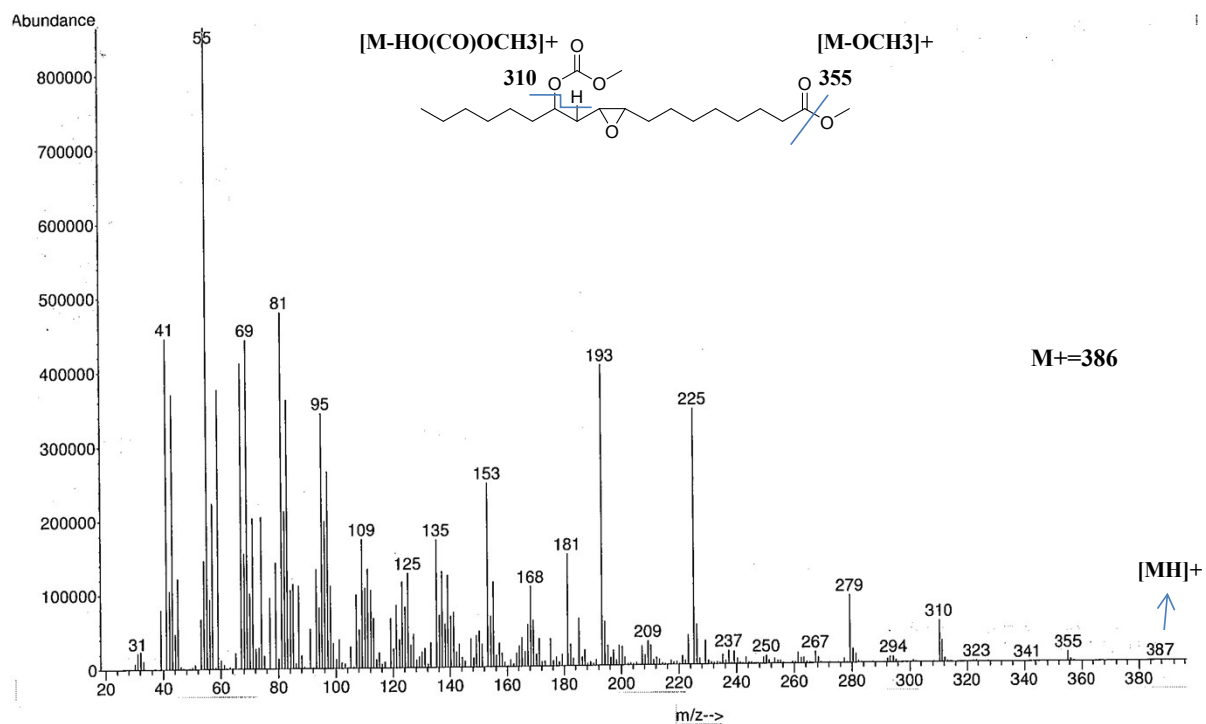

Figure S4. The mass spectrum of 3a

|                                                                   |                                                                    |                                         |
|-------------------------------------------------------------------|--------------------------------------------------------------------|-----------------------------------------|
|                                                                   |                                                                    | Five anti (SSR) stabilized by 15 kJ/mol |
| 5a <i>syn</i> (RSR) -1235.1990 a.u.<br>-OC(O)O-bond angle 110.14° | 5a <i>anti</i> (SSR) -1235.2019 a.u.<br>-OC(O)O-bond angle 110.12° |                                         |
|                                                                   |                                                                    |                                         |
| 5b <i>syn</i> (SSS) -1235.1960 a.u.<br>-OC(O)O-bond angle 118.57° | 5b <i>anti</i> (SRS) -1235.1891 a.u.<br>-OC(O)O-bond angle 118.31° |                                         |

Figure S5. Energy profiles calculated for five and six membered cyclic carbonates (Red coloured are stable structures).

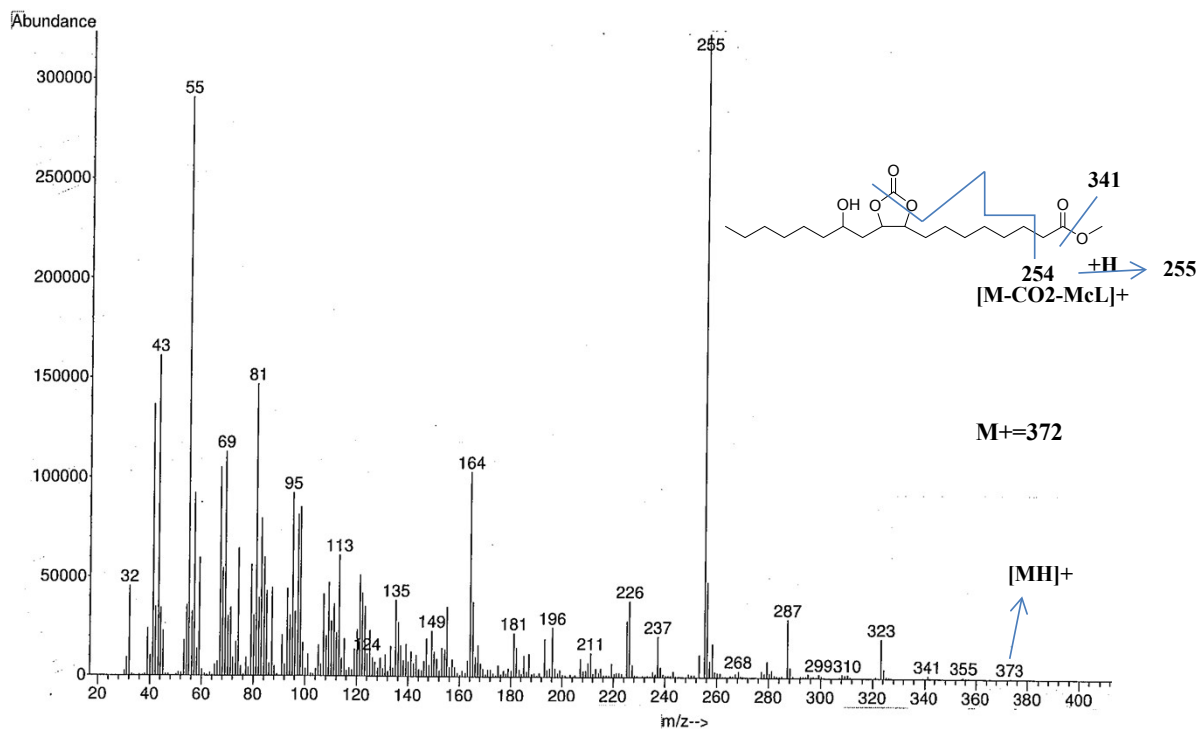

Figure S6. The mass spectrum of 5

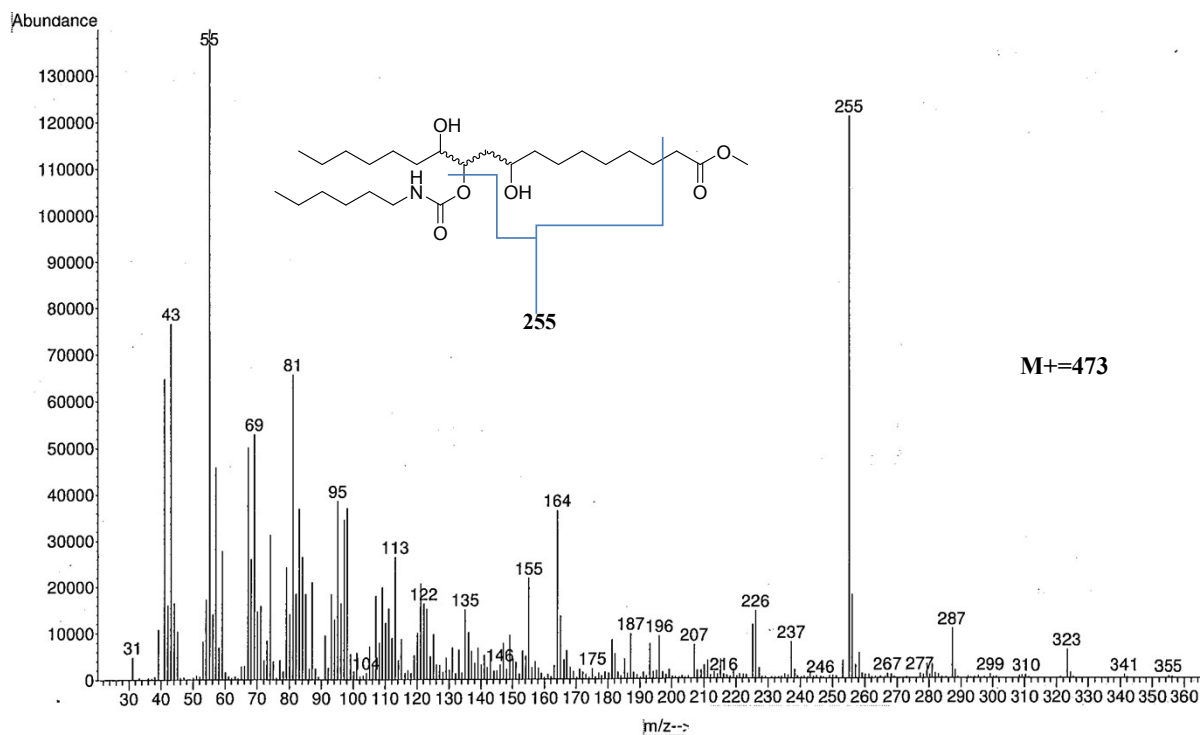

Figure S7. The mass spectrum of 6

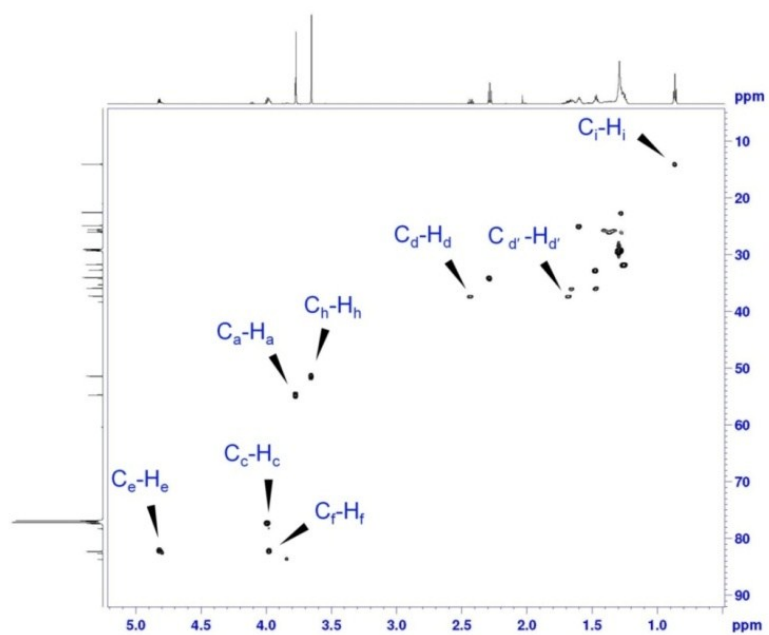

**Figure S8.**  $^{13}\text{C}$ - $^1\text{H}$  HSQC spectrum of **4a** ( $\text{CDCl}_3$ , 298 K, Bruker Avance 700 MHz).

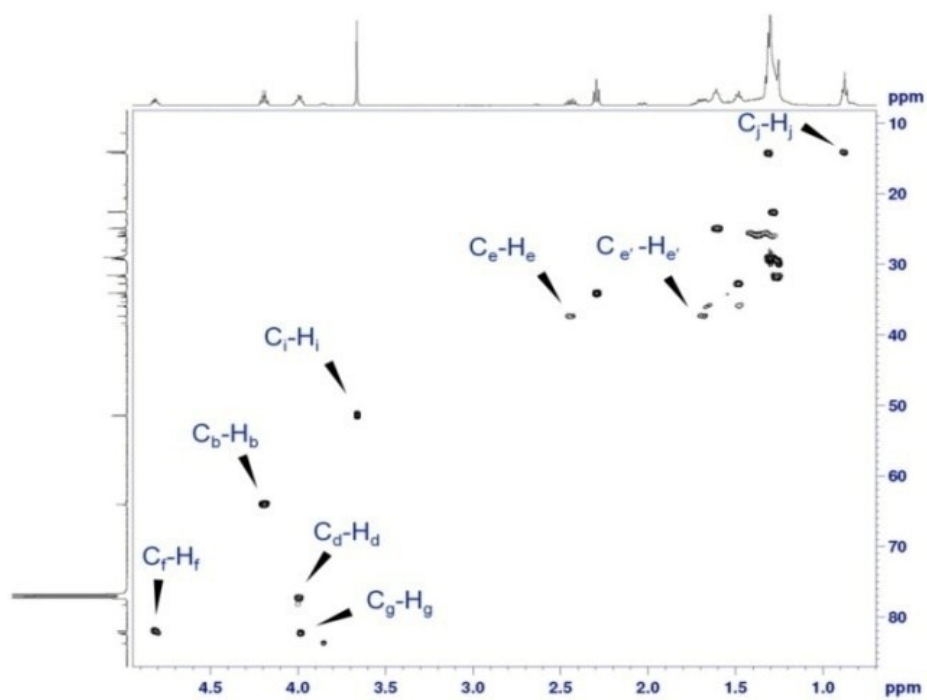

**Figure S9.**  $^{13}\text{C}$ - $^1\text{H}$  HSQC spectrum of **4b** ( $\text{CDCl}_3$ , 298 K, Bruker Avance 500 MHz).

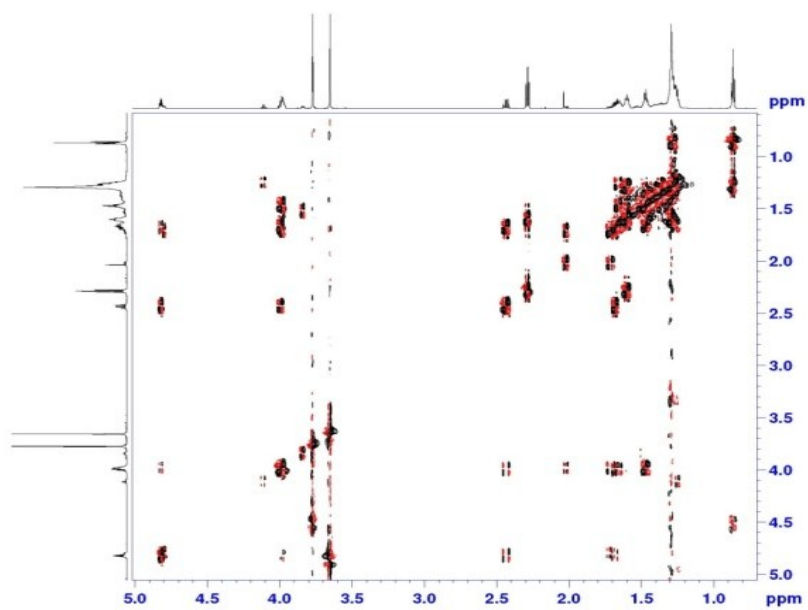

**Figure S10.** DQFCOSY spectrum of **4a** ( $\text{CDCl}_3$ , 298 K, Bruker Avance 700 MHz).

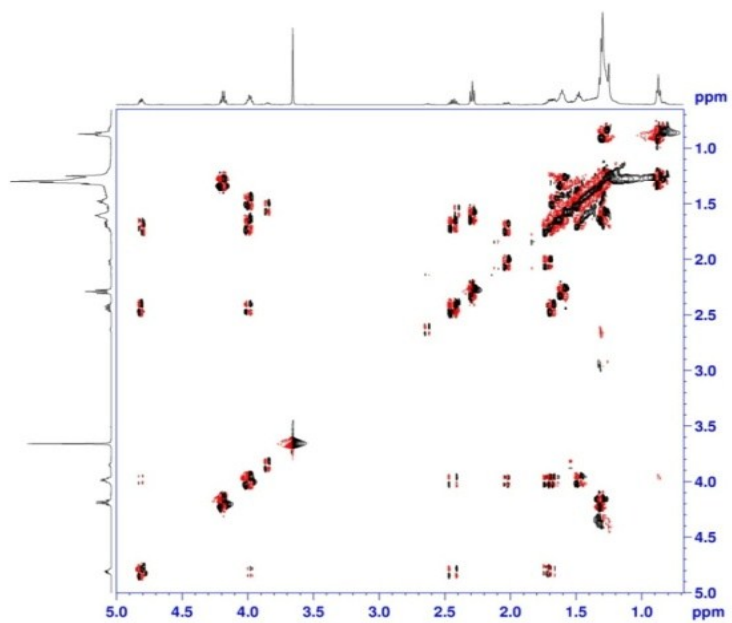

**Figure S11.** DQFCOSY spectrum of **4b** ( $\text{CDCl}_3$ , 298 K, Bruker Avance 500 MHz).

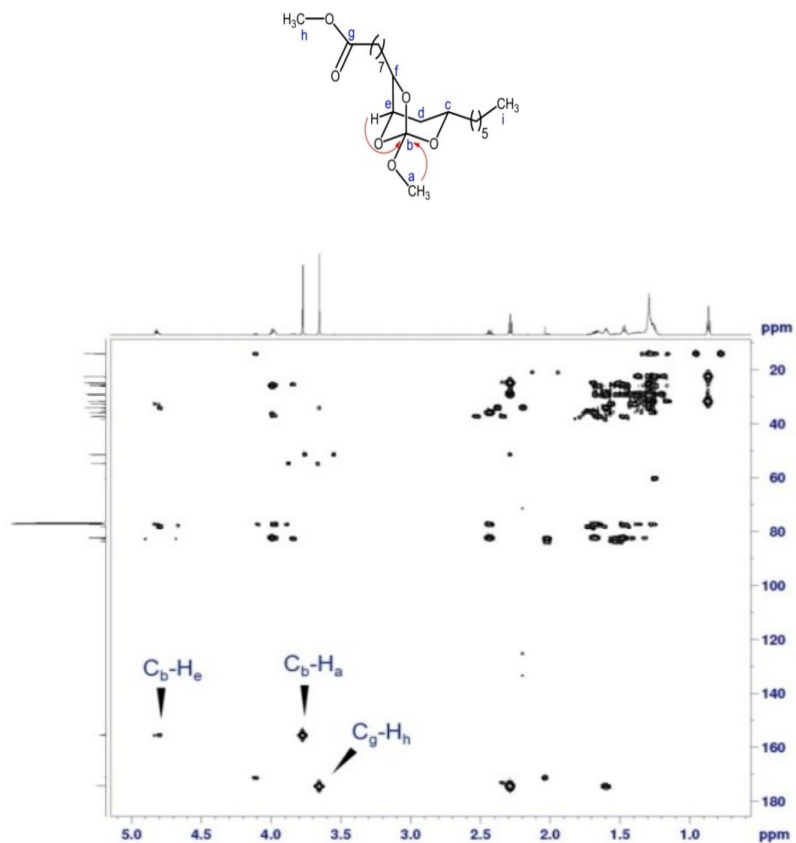

**Figure S12.**  $^{13}\text{C}$ - $^1\text{H}$  HMBC spectrum of **4a** (red arrows) ( $\text{CDCl}_3$ , 298K, Bruker Avance 700 MHz).

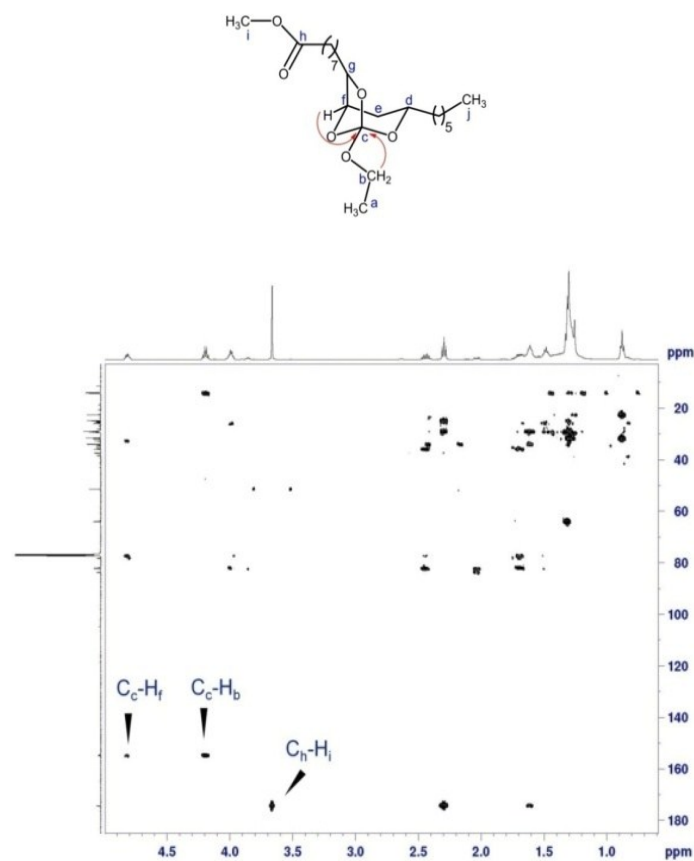

**Figure S13.**  $^{13}\text{C}$ - $^1\text{H}$  HMBC spectrum of **4b** (red arrows)( $\text{CDCl}_3$ , 298 K, Bruker Avance 500 MHz).

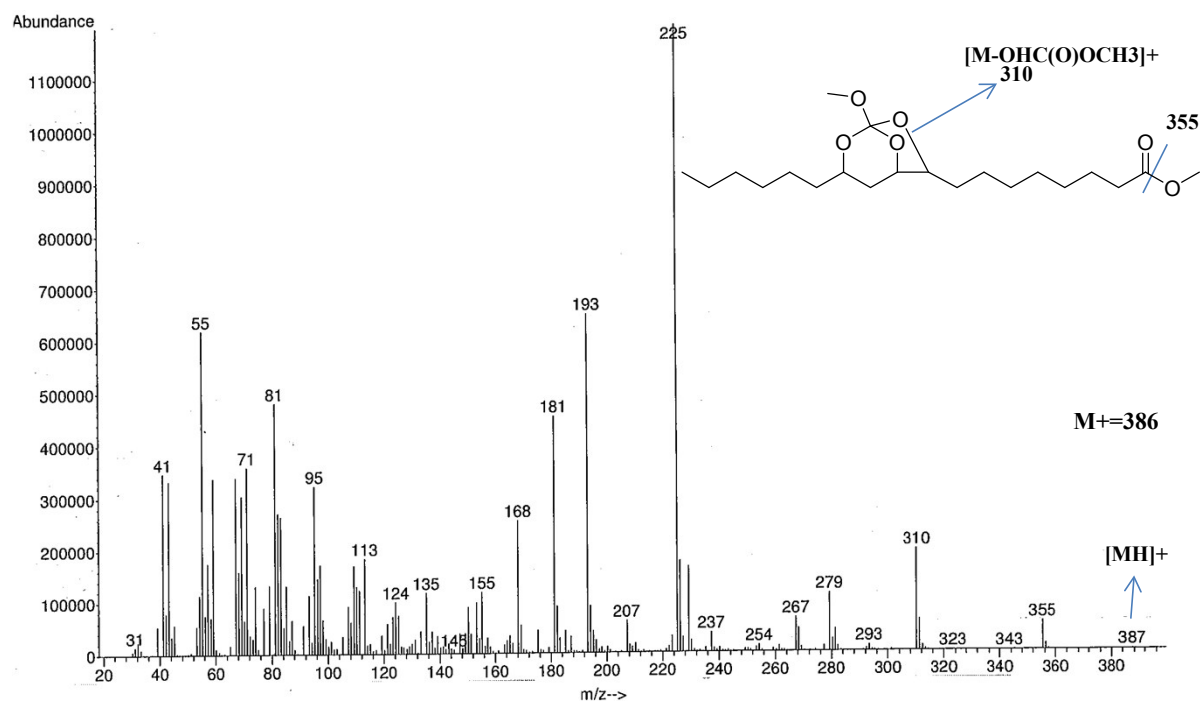

**Figure S14.** The mass spectrum of **4a**



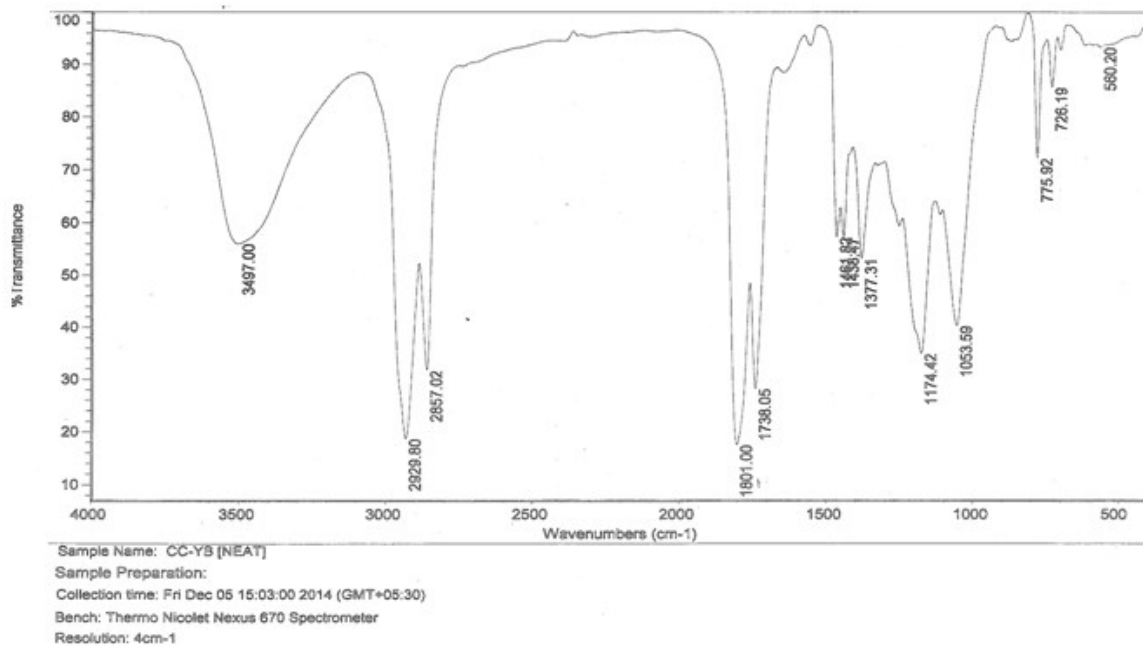

FT-IR spectrum of cyclic carbonates

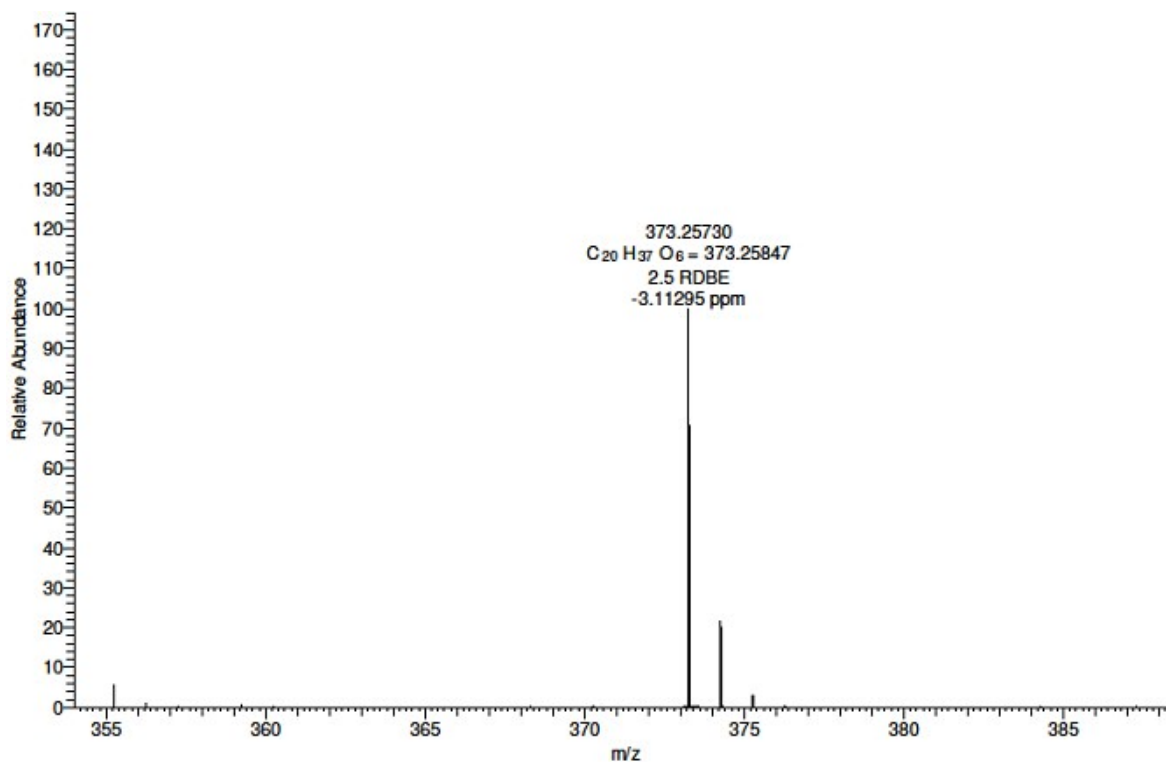

HRMS Spectrum of cyclic carbonates
